# Supplementary material for: Electronic and geometric effects in an Au@NiO core–shell nanocatalyst on the oxidative esterification of aldehydes
Source: Royal Society of Chemistry journal article supplement (doi:10.1039/d4nr03302g), 2024-11-27
Supplement: d4nr03302g1.pdf [file d4nr03302g1.pdf]

*Electronic supplementary information*

**Electronic and geometric effects in an Au@NiO core-shell nanocatalyst on the oxidative esterification of aldehydes**

Shaoqi Zhan,\*<sup>1</sup> Haohong Song<sup>2</sup>, Zili Wu,<sup>3,4</sup> and De-en Jiang\*<sup>5</sup>

<sup>1</sup> Department of Chemistry-Ångström, Uppsala University, Box 523, 751 20 Uppsala, Sweden

<sup>2</sup> Interdisciplinary Materials Science, Vanderbilt University, Nashville, Tennessee, 37235, United States

<sup>3</sup> Chemical Sciences Division, Oak Ridge National Laboratory, Oak Ridge, Tennessee 37831, United States

<sup>4</sup> Center for Nanophase Materials Sciences, Oak Ridge National Laboratory, Oak Ridge, Tennessee 37831, United States

<sup>5</sup> Department of Chemical and Biomolecular Engineering, Vanderbilt University, Nashville, Tennessee 37235, United States

Email: shaoqi.zhan@kemi.uu.se; de-en.jiang@vanderbilt.edu

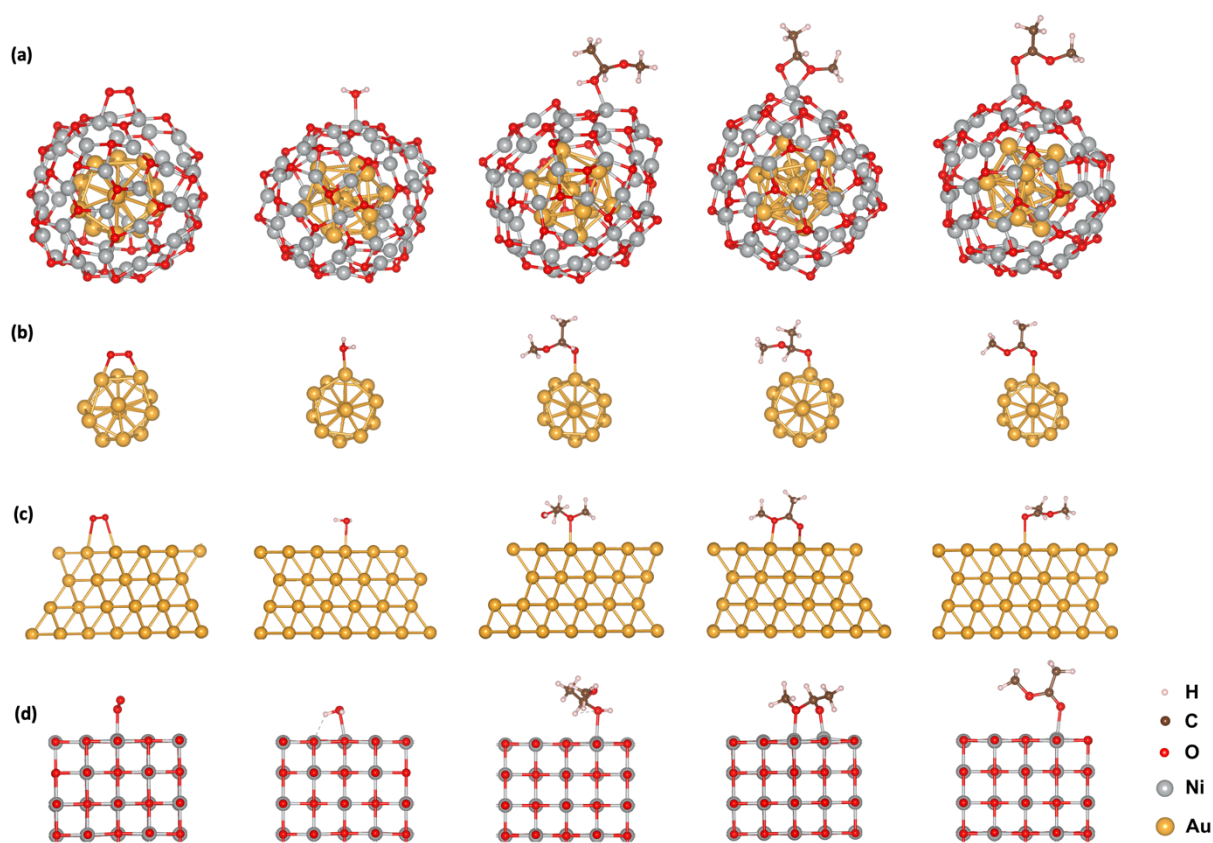

**Figure S1.** Optimized structures of  $\text{O}_2$ ,  $\text{H}_2\text{O}$ , hemiacetal, deprotonated hemiacetal, and ester molecules adsorbed on the different surfaces: (a) the  $\text{Au}_{13}@\text{(NiO)}_{48}$  core-shell NP; (b)  $\text{Au}_{13}$ ; (c)  $\text{Au}(111)$ ; (d)  $\text{NiO}(100)$ .

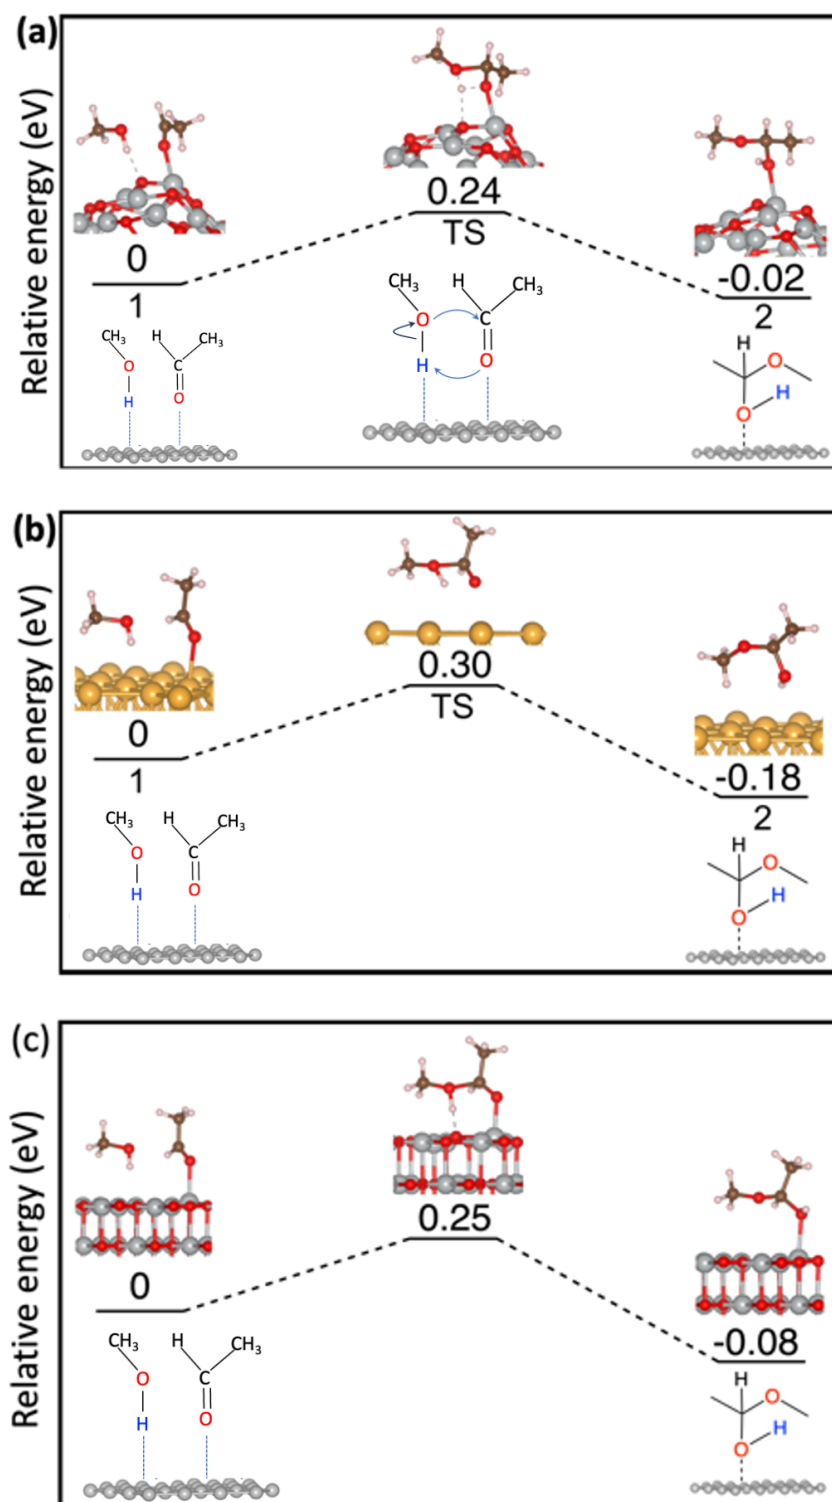

**Figure S2.** Energy profiles of the hemiacetal formation reaction: (a) on  $\text{Au}_{13}@\text{(NiO)}_{48}$ ; (b) on  $\text{Au}(111)$ ; (c) on  $\text{NiO}(100)$ . The structures exclusively display the region where molecules are adsorbed.

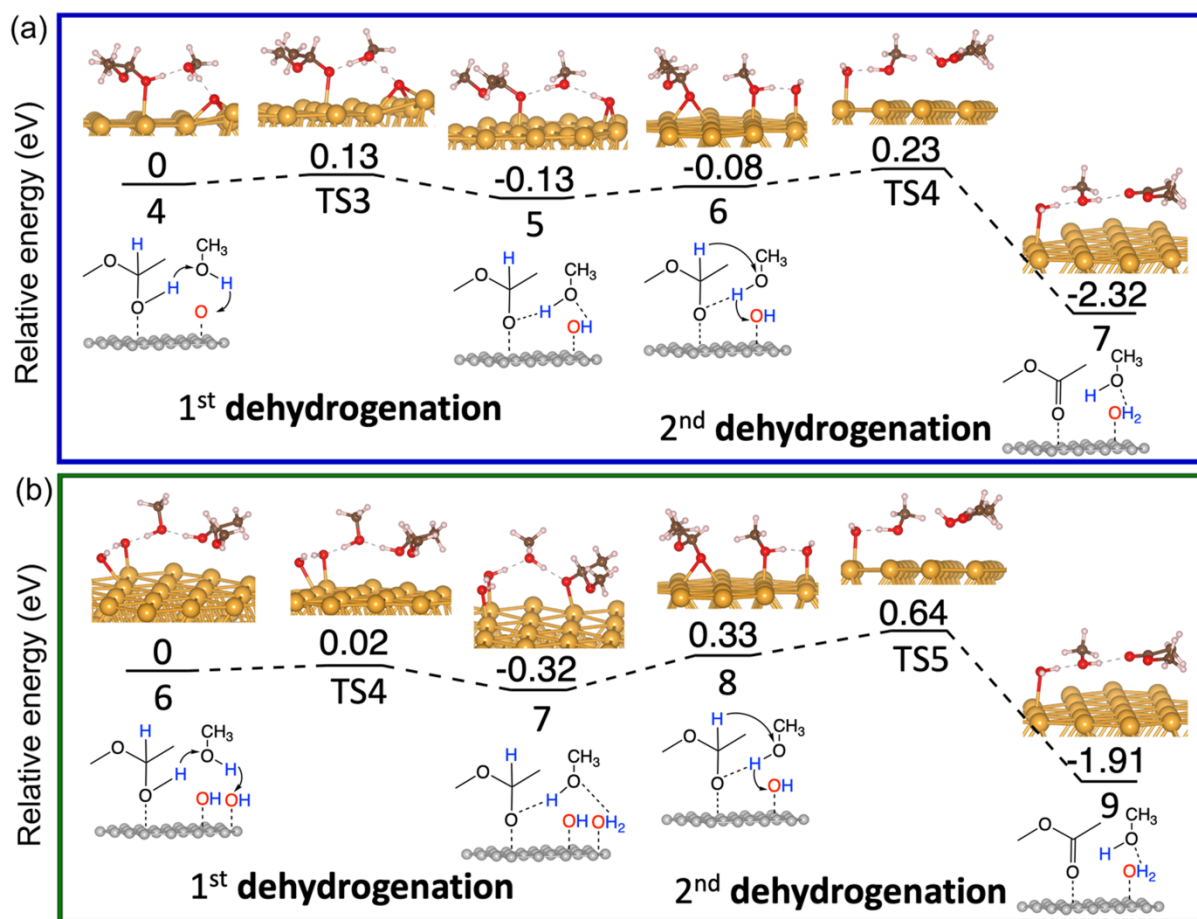

**Figure S3.** Energy profiles of oxidative dehydrogenation of the 2<sup>nd</sup> hemiacetal on Au(111): (a) via the oxo pathway; (b) via the hydrogen peroxide pathway.

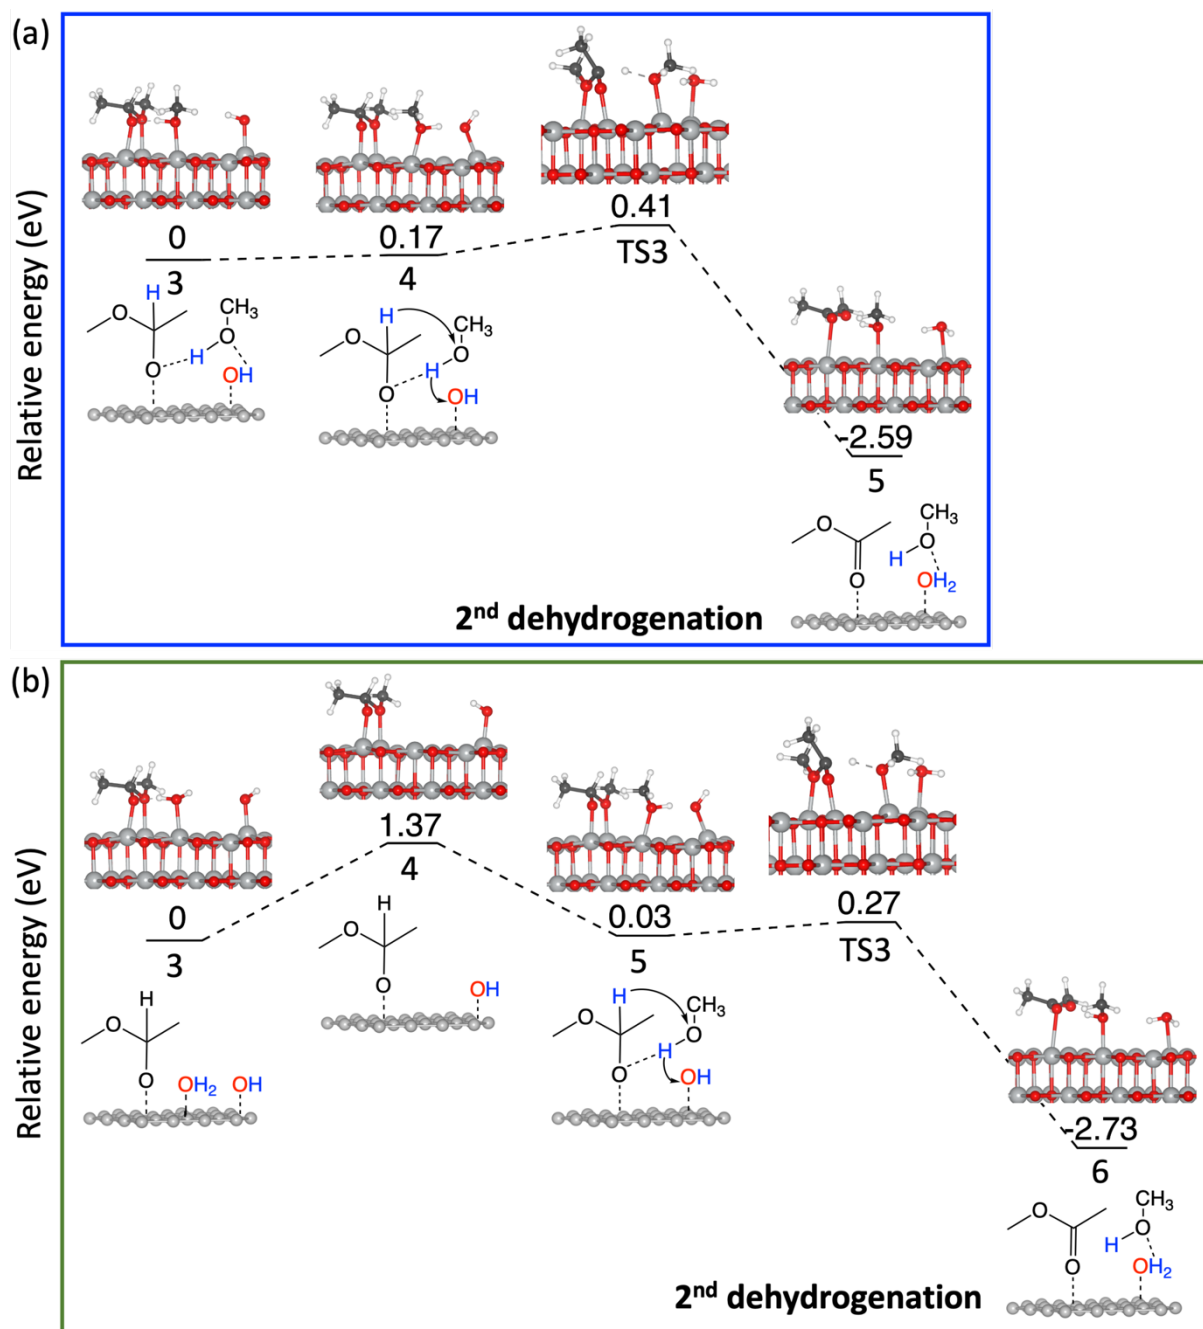

**Figure S4.** Energy profiles of oxidative dehydrogenation of the 2<sup>nd</sup> hemiacetal on NiO(100): (a) via the oxo pathway; (b) via the hydrogen peroxide pathway.

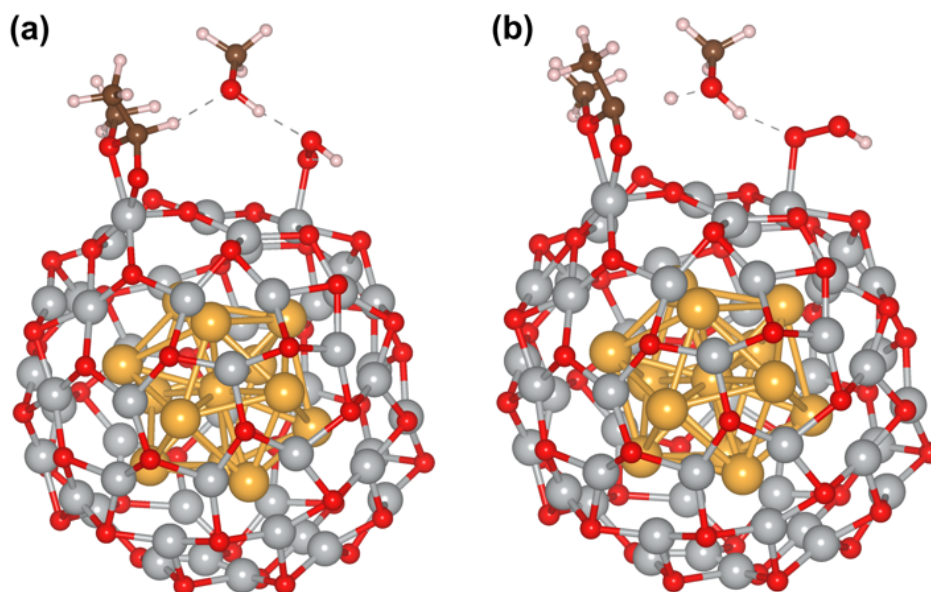

**Figure S5.** Optimized transition state structures for the dehydrogenation of the adsorbed deprotonated hemiacetal: (a) via the oxo pathway; (b) via the hydrogen peroxide pathway.

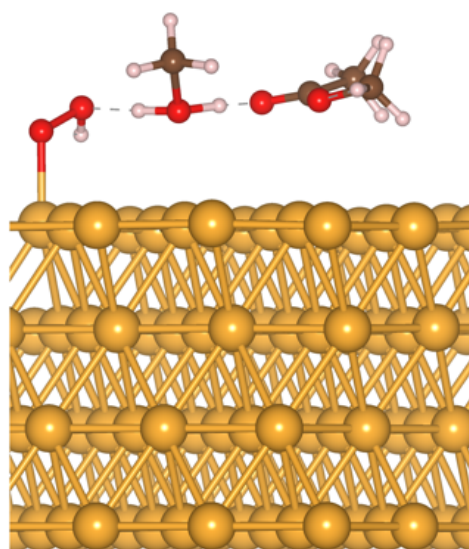

**Figure S6.** Optimized transition state of dehydrogenation of the adsorbed deprotonated hemiacetal via the oxo pathway on Au(111).

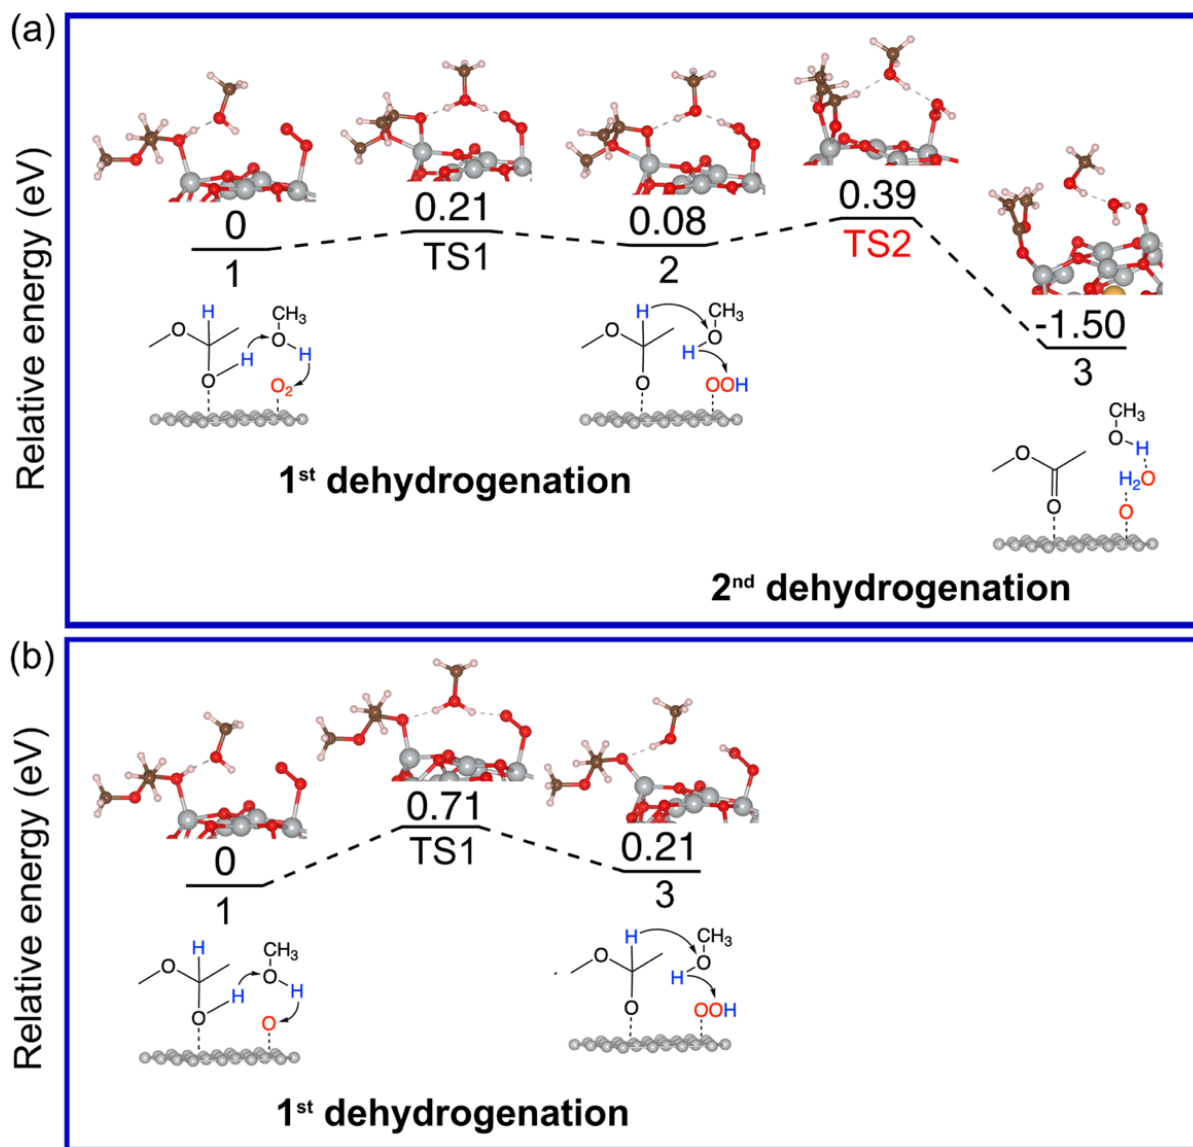

**Figure S7.** Energy profiles of the first oxidative dehydrogenation of hemiacetal  $\text{Au}_{13}@\text{(NiO)}_{48}$ : (a) via the bidentate adsorption mode; (b) via the monodentate adsorption mode.

**Table S1.** Adsorption energies (in eV) of four key species on Au<sub>13</sub>@(NiO)<sub>48</sub>, Au<sub>13</sub>, Au(111), and NiO(100).

|                                | <b>Au<sub>13</sub>@(NiO)<sub>48</sub></b> | <b>Au<sub>13</sub></b> | <b>Au(111)</b> | <b>NiO(100)</b> |
|--------------------------------|-------------------------------------------|------------------------|----------------|-----------------|
| <b>O<sub>2</sub></b>           | -0.85                                     | -1.79                  | -1.23          | -1.04           |
| <b>H<sub>2</sub>O</b>          | -0.39                                     | -0.44                  | -0.29          | -0.66           |
| <b>Hemiacetal</b>              | -0.91                                     | -0.66                  | -0.69          | -0.84           |
| <b>Deprotonated hemiacetal</b> | -2.20                                     | -2.18                  | -1.78          | -1.81           |
| <b>Ester</b>                   | -0.67                                     | -0.76                  | -0.68          | -0.47           |

**Table S2.** Adsorption mode and energy ( $E_{ad}$ ) of deprotonated hemiacetal on Au<sub>13</sub>@(NiO)<sub>48</sub>, Au(111), and NiO(100).

|                                 | <b>Au<sub>13</sub>@(NiO)<sub>48</sub></b> | <b>Au<sub>13</sub>@(NiO)<sub>48</sub></b> | <b>Au(111)</b> | <b>NiO(100)</b> |
|---------------------------------|-------------------------------------------|-------------------------------------------|----------------|-----------------|
| <b>Mode</b>                     | Bidentate                                 | Monodentate                               | Bridging       | Bridging        |
| <b><math>E_{ad}</math> (eV)</b> | -2.20                                     | -1.68                                     | -1.78          | -1.81           |



## Microkinetic modeling details

For surface reactions, the pre-exponential factor is assumed to be  $10^{11} \text{ s}^{-1}$ , as proposed by Pal and coworkers.<sup>1</sup>

Adsorption processes are treated as nonactivated with the rate constant and rate per site expressed as  $k_{ads} = \frac{P \cdot A}{\sqrt{2\pi m k_B T}}$  and  $r_{ads} = P k_{ads} (1 - \theta)$ , respectively.<sup>2</sup>

Desorption rate constant ( $k_{des}$ )<sup>2</sup> is described as  $k_{des} = \frac{k_B T^3}{h^3} \cdot A \cdot \left( \frac{2\pi m k_B}{\sigma \theta_{rot}} \right) \cdot \exp\left(-\frac{E_{des}}{RT}\right)$ .

P - the gas pressure

A - the site surface area, approximated to be  $1 \times 10^{-19} \text{ m}^2$

$k_B$  - the Boltzmann constant

T - temperature

m - mass of reactant

h - the Planck's constant

$\theta$  - the coverage rate

$\sigma$  - the sticking coefficient which has a default value of 1 for all reactions

I - a molecular moment of inertia; see Table S4

$\theta_{rot}$  - the rotational temperature in K ( $\theta_{rot} = \frac{h^2}{8\pi^2 k_B I}$ ); see Table S4

**Table S3.** The elementary reaction steps and corresponding forward and reverse barriers used for microkinetic modelling.

| Surface_<br>Pathway                          | Elementary reaction                                                                                                                                          | Forward<br>E <sub>act</sub> (eV) | Backward<br>E <sub>act</sub> (eV) |
|----------------------------------------------|--------------------------------------------------------------------------------------------------------------------------------------------------------------|----------------------------------|-----------------------------------|
| Au(111)<br>_H <sub>2</sub> O <sub>2</sub>    | CH <sub>3</sub> OH + * ⇌ CH <sub>3</sub> OH*                                                                                                                 | -                                | 0.69                              |
|                                              | CH <sub>3</sub> CH(OH)OCH <sub>3</sub> + * ⇌ CH <sub>3</sub> CH(OH)OCH <sub>3</sub> *                                                                        | -                                | 0.69                              |
|                                              | O <sub>2</sub> + * ⇌ O <sub>2</sub> *                                                                                                                        | -                                | 1.23                              |
|                                              | CH <sub>3</sub> CH(OH)OCH <sub>3</sub> * + O <sub>2</sub> * + CH <sub>3</sub> OH* ⇌ CH <sub>3</sub> CHOOCH <sub>3</sub> * + OOH* + CH <sub>3</sub> OH*       | 0.23                             | 0.07                              |
|                                              | CH <sub>3</sub> CHOOCH <sub>3</sub> * + OOH* + CH <sub>3</sub> OH* ⇌ CH <sub>3</sub> COOCH <sub>3</sub> * + CH <sub>3</sub> OH* + HOOH*                      | 0.81                             | 2.67                              |
|                                              | HOOH* + * ⇌ 2OH*                                                                                                                                             | 0.37                             | 1.19                              |
|                                              | CH <sub>3</sub> CH(OH)OCH <sub>3</sub> * + OH* + CH <sub>3</sub> OH* ⇌ CH <sub>3</sub> CHOOCH <sub>3</sub> * + H <sub>2</sub> O* + CH <sub>3</sub> OH*       | 0.02                             | 0.34                              |
|                                              | H <sub>2</sub> O + * ⇌ H <sub>2</sub> O*                                                                                                                     | -                                | 0.29                              |
|                                              | CH <sub>3</sub> CHOOCH <sub>3</sub> * + CH <sub>3</sub> OH* + OH* ⇌ CH <sub>3</sub> COOCH <sub>3</sub> * + H <sub>2</sub> O* + CH <sub>3</sub> OH*           | 0.31                             | 2.55                              |
|                                              | CH <sub>3</sub> COOCH <sub>3</sub> + * ⇌ CH <sub>3</sub> COOCH <sub>3</sub> *                                                                                | -                                | 0.68                              |
| Au(111)<br>_oxo                              | CH <sub>3</sub> OH + * ⇌ CH <sub>3</sub> OH*                                                                                                                 | -                                | 0.69                              |
|                                              | CH <sub>3</sub> CH(OH)OCH <sub>3</sub> + * ⇌ CH <sub>3</sub> CH(OH)OCH <sub>3</sub> *                                                                        | -                                | 0.69                              |
|                                              | O <sub>2</sub> + * ⇌ O <sub>2</sub> *                                                                                                                        | -                                | 1.23                              |
|                                              | CH <sub>3</sub> CH(OH)OCH <sub>3</sub> * + O <sub>2</sub> * + CH <sub>3</sub> OH* ⇌ CH <sub>3</sub> CHOOCH <sub>3</sub> * + OOH* + CH <sub>3</sub> OH*       | 0.23                             | 0.07                              |
|                                              | CH <sub>3</sub> CHOOCH <sub>3</sub> * + OOH* + CH <sub>3</sub> OH* + * ⇌ CH <sub>3</sub> COOCH <sub>3</sub> * + CH <sub>3</sub> OH* + O* + H <sub>2</sub> O* | 0.68                             | 3.63                              |
|                                              | CH <sub>3</sub> CH(OH)OCH <sub>3</sub> * + O* + CH <sub>3</sub> OH* ⇌ CH <sub>3</sub> CHOOCH <sub>3</sub> * + OH* + CH <sub>3</sub> OH*                      | 0.13                             | 0.26                              |
|                                              | H <sub>2</sub> O + * ⇌ H <sub>2</sub> O*                                                                                                                     | -                                | 0.29                              |
|                                              | CH <sub>3</sub> CHOOCH <sub>3</sub> * + CH <sub>3</sub> OH* + OH* ⇌ CH <sub>3</sub> COOCH <sub>3</sub> * + H <sub>2</sub> O* + CH <sub>3</sub> OH*           | 0.31                             | 2.55                              |
|                                              | CH <sub>3</sub> COOCH <sub>3</sub> + * ⇌ CH <sub>3</sub> COOCH <sub>3</sub> *                                                                                | -                                | 0.68                              |
|                                              | CH <sub>3</sub> OH + * ⇌ CH <sub>3</sub> OH*                                                                                                                 | -                                | 1.69                              |
| NiO(100)<br>_H <sub>2</sub> O <sub>2</sub>   | CH <sub>3</sub> CH(OH)OCH <sub>3</sub> + * ⇌ CH <sub>3</sub> CH(OH)OCH <sub>3</sub> *                                                                        | -                                | 0.84                              |
|                                              | O <sub>2</sub> + * ⇌ O <sub>2</sub> *                                                                                                                        | -                                | 1.04                              |
|                                              | CH <sub>3</sub> CH(OH)OCH <sub>3</sub> * + O <sub>2</sub> * + CH <sub>3</sub> OH* ⇌ CH <sub>3</sub> CHOOCH <sub>3</sub> * + OOH* + CH <sub>3</sub> OH*       | 0.47                             | 0.20                              |
|                                              | CH <sub>3</sub> CHOOCH <sub>3</sub> * + OOH* + CH <sub>3</sub> OH* ⇌ CH <sub>3</sub> COOCH <sub>3</sub> * + CH <sub>3</sub> OH* + HOOH*                      | 1.62                             | 3.28                              |
|                                              | HOOH* + * ⇌ 2OH*                                                                                                                                             | 0.48                             | 0.40                              |
|                                              | CH <sub>3</sub> CH(OH)OCH <sub>3</sub> * + OH* + CH <sub>3</sub> OH* ⇌ CH <sub>3</sub> CHOOCH <sub>3</sub> * + H <sub>2</sub> O* + CH <sub>3</sub> OH*       | 0.10                             | 0.17                              |
|                                              | H <sub>2</sub> O + * ⇌ H <sub>2</sub> O*                                                                                                                     | -                                | 0.66                              |
|                                              | CH <sub>3</sub> CHOOCH <sub>3</sub> * + CH <sub>3</sub> OH* + OH* ⇌ CH <sub>3</sub> COOCH <sub>3</sub> * + H <sub>2</sub> O* + CH <sub>3</sub> OH*           | 0.24                             | 3.00                              |
|                                              | CH <sub>3</sub> COOCH <sub>3</sub> + * ⇌ CH <sub>3</sub> COOCH <sub>3</sub> *                                                                                | -                                | 0.47                              |
| CH <sub>3</sub> OH + * ⇌ CH <sub>3</sub> OH* | -                                                                                                                                                            | 1.69                             |                                   |
| NiO(100)<br>_oxo                             | CH <sub>3</sub> CH(OH)OCH <sub>3</sub> + * ⇌ CH <sub>3</sub> CH(OH)OCH <sub>3</sub> *                                                                        | -                                | 0.84                              |
|                                              | O <sub>2</sub> + * ⇌ O <sub>2</sub> *                                                                                                                        | -                                | 1.04                              |
|                                              | CH <sub>3</sub> CH(OH)OCH <sub>3</sub> * + O <sub>2</sub> * + CH <sub>3</sub> OH* ⇌ CH <sub>3</sub> CHOOCH <sub>3</sub> * + OOH* + CH <sub>3</sub> OH*       | 0.47                             | 0.20                              |
|                                              | CH <sub>3</sub> CHOOCH <sub>3</sub> * + OOH* + CH <sub>3</sub> OH* + * ⇌ CH <sub>3</sub> COOCH <sub>3</sub> * + CH <sub>3</sub> OH* + O* + H <sub>2</sub> O* | 1.63                             | 3.20                              |
|                                              | CH <sub>3</sub> CH(OH)OCH <sub>3</sub> * + O* + CH <sub>3</sub> OH* ⇌ CH <sub>3</sub> CHOOCH <sub>3</sub> * + OH* + CH <sub>3</sub> OH*                      | 0.17                             | 0.26                              |
|                                              | H <sub>2</sub> O + * ⇌ H <sub>2</sub> O*                                                                                                                     | -                                | 0.66                              |
|                                              | CH <sub>3</sub> CHOOCH <sub>3</sub> * + CH <sub>3</sub> OH* + OH* ⇌ CH <sub>3</sub> COOCH <sub>3</sub> * + H <sub>2</sub> O* + CH <sub>3</sub> OH*           | 0.41                             | 3.00                              |
|                                              | CH <sub>3</sub> COOCH <sub>3</sub> + * ⇌ CH <sub>3</sub> COOCH <sub>3</sub> *                                                                                | -                                | 0.47                              |
|                                              | CH <sub>3</sub> OH + * ⇌ CH <sub>3</sub> OH*                                                                                                                 | -                                | 0.64                              |
| Au@NiO<br>_H <sub>2</sub> O <sub>2</sub>     | CH <sub>3</sub> CH(OH)OCH <sub>3</sub> + * ⇌ CH <sub>3</sub> CH(OH)OCH <sub>3</sub> *                                                                        | -                                | 0.91                              |
|                                              | O <sub>2</sub> + * ⇌ O <sub>2</sub> *                                                                                                                        | -                                | 0.85                              |
|                                              | CH <sub>3</sub> CH(OH)OCH <sub>3</sub> * + O <sub>2</sub> * + CH <sub>3</sub> OH* ⇌ CH <sub>3</sub> CHOOCH <sub>3</sub> * + OOH* + CH <sub>3</sub> OH*       | 0.21                             | 0.13                              |
|                                              | CH <sub>3</sub> CHOOCH <sub>3</sub> * + OOH* + CH <sub>3</sub> OH* ⇌ CH <sub>3</sub> COOCH <sub>3</sub> * + CH <sub>3</sub> OH* + HOOH*                      | 0.47                             | 2.04                              |
|                                              | HOOH* + * ⇌ 2OH*                                                                                                                                             | 0.05                             | 0.99                              |
|                                              | CH <sub>3</sub> CH(OH)OCH <sub>3</sub> * + OH* + CH <sub>3</sub> OH* ⇌ CH <sub>3</sub> CHOOCH <sub>3</sub> * + H <sub>2</sub> O* + CH <sub>3</sub> OH*       | 0.10                             | 0.17                              |
|                                              | H <sub>2</sub> O + * ⇌ H <sub>2</sub> O*                                                                                                                     | -                                | 0.39                              |
|                                              | CH <sub>3</sub> CHOOCH <sub>3</sub> * + CH <sub>3</sub> OH* + OH* ⇌ CH <sub>3</sub> COOCH <sub>3</sub> * + H <sub>2</sub> O* + CH <sub>3</sub> OH*           | 0.03                             | 2.48                              |
|                                              | CH <sub>3</sub> COOCH <sub>3</sub> + * ⇌ CH <sub>3</sub> COOCH <sub>3</sub> *                                                                                | -                                | 0.67                              |
| CH <sub>3</sub> OH + * ⇌ CH <sub>3</sub> OH* | -                                                                                                                                                            | 0.64                             |                                   |
| Au@NiO<br>_oxo                               | CH <sub>3</sub> CH(OH)OCH <sub>3</sub> + * ⇌ CH <sub>3</sub> CH(OH)OCH <sub>3</sub> *                                                                        | -                                | 0.91                              |
|                                              | O <sub>2</sub> + * ⇌ O <sub>2</sub> *                                                                                                                        | -                                | 0.85                              |
|                                              | CH <sub>3</sub> CH(OH)OCH <sub>3</sub> * + O <sub>2</sub> * + CH <sub>3</sub> OH* ⇌ CH <sub>3</sub> CHOOCH <sub>3</sub> * + OOH* + CH <sub>3</sub> OH*       | 0.21                             | 0.13                              |
|                                              | CH <sub>3</sub> CHOOCH <sub>3</sub> * + OOH* + CH <sub>3</sub> OH* + * ⇌ CH <sub>3</sub> COOCH <sub>3</sub> * + CH <sub>3</sub> OH* + O* + H <sub>2</sub> O* | 0.31                             | 1.89                              |
|                                              | CH <sub>3</sub> CH(OH)OCH <sub>3</sub> * + O* + CH <sub>3</sub> OH* ⇌ CH <sub>3</sub> CHOOCH <sub>3</sub> * + OH* + CH <sub>3</sub> OH*                      | 0.03                             | 2.30                              |
|                                              | H <sub>2</sub> O + * ⇌ H <sub>2</sub> O*                                                                                                                     | -                                | 0.39                              |
|                                              | CH <sub>3</sub> CHOOCH <sub>3</sub> * + CH <sub>3</sub> OH* + OH* ⇌ CH <sub>3</sub> COOCH <sub>3</sub> * + H <sub>2</sub> O* + CH <sub>3</sub> OH*           | 0.08                             | 1.56                              |
|                                              | CH <sub>3</sub> COOCH <sub>3</sub> + * ⇌ CH <sub>3</sub> COOCH <sub>3</sub> *                                                                                | -                                | 0.67                              |

**Table S4.** The rotational temperature and molecular moment of inertia used for microkinetic modelling.

| Molecular                              | I ( $10^{-46}\text{kg}\cdot\text{m}^2$ ) | $\theta_{\text{rot}}(\text{K})$ |
|----------------------------------------|------------------------------------------|---------------------------------|
| H <sub>2</sub> O                       | 0.10                                     | 39.38                           |
| CH <sub>3</sub> OH                     | 1.02                                     | 3.95                            |
| O <sub>2</sub>                         | 1.94                                     | 2.08                            |
| CH <sub>3</sub> CH(OH)OCH <sub>3</sub> | 9.59                                     | 0.42                            |
| CH <sub>3</sub> COOCH <sub>3</sub>     | 9.04                                     | 0.45                            |

#### References

- (1) Pal, N.; Srivastava, A.; Agrawal, S.; Rai, J. S. P. Kinetics and Mechanism of Esterification of Monoepoxies. *Materials and Manufacturing Processes* **2005**, *20* (2), 317-327.
- (2) Filot, I. A. W. Introduction to microkinetic modeling. **2018**, Technische Universiteit Eindhoven.
